# Supplementary material
Source: PubMed Central journal article supplement (PMC4410966)
Supplement: NIHMS677420-supplement-Mattsson.pdf [file NIHMS677420-supplement-Mattsson.pdf]

## Supplementary Online Content

Mattsson N, Insel PS, Nosheny R, et al; Alzheimer's Disease Neuroimaging Initiative. Emerging  $\beta$ -amyloid pathology and accelerated cortical atrophy. *JAMA Neurol*. Published online April 28, 2014. doi:10.1001/jamaneurol.2014.446

**eFigure 1.** Baseline Cortical Thickness in A Priori Defined Gray Matter (GM) Regions

**eFigure 2.** Atrophy Rates (Cortical Thickness) in A Priori Defined Gray Matter (GM) Regions

**eFigure 3.** Baseline Volumes in A Priori Defined Gray Matter (GM) Regions, Including All Participants

**eFigure 4.** Atrophy Rates in A Priori Defined Gray Matter (GM) Regions, Including All Participants

This supplementary material has been provided by the authors to give readers additional information about their work.

**eFigure 1.** Baseline Cortical Thickness in A Priori Defined Gray Matter (GM) Regions

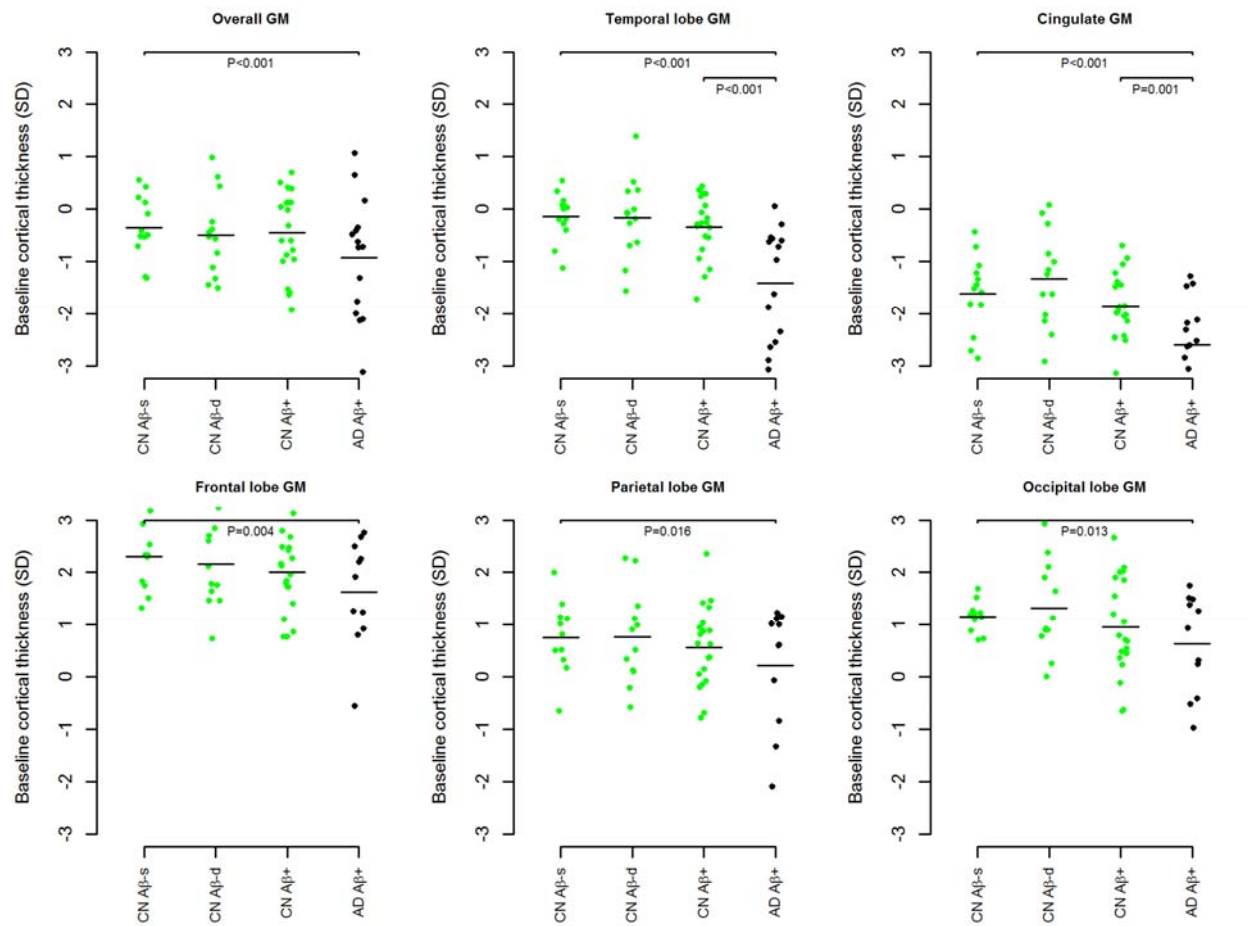

Baseline cortical thickness in stable A $\beta$  negative normal controls (CN A $\beta$ -s), declining A $\beta$  negative normal controls (CN A $\beta$ -d), A $\beta$  positive normal controls (CN A $\beta$ +), and A $\beta$  positive AD dementia patients (AD A $\beta$ +). Thicknesses are centered and standardized. Baseline thicknesses are modeled data from linear mixed effects models (intercepts), adjusted for age, sex, education, and *APOE* genotype. Horizontal lines are mean values. Significances are indicated for the group effects (pair-wise comparisons; CN A $\beta$ -s vs. CN A $\beta$ -d, CN A $\beta$ -s vs. CN A $\beta$ +, CN A $\beta$ -s vs. AD A $\beta$ +, and CN A $\beta$ + vs. AD A $\beta$ +). When correcting for multiple comparisons (false discovery rate), the differences that remained significant were (\*, P<0.05; \*\*, P<0.01; \*\*\*,

© 2014 American Medical Association. All rights reserved.

P<0.001): overall GM, CN A $\beta$ -s vs. AD A $\beta$ + (\*\*\*) ; temporal GM, CN A $\beta$ -s vs. AD A $\beta$ + (\*\*\*) , CN A $\beta$ + vs. AD A $\beta$ + (\*\*\*) ; cingulate GM, CN A $\beta$ -s vs. AD A $\beta$ + (\*\*\*) , CN A $\beta$ + vs. AD A $\beta$ + (\*\*); frontal GM, CN A $\beta$ -s vs. AD A $\beta$ + (\*); parietal GM, CN A $\beta$ -s vs. AD A $\beta$ + (\*); occipital GM, CN A $\beta$ -s vs. AD A $\beta$ + (\*).

**eFigure 2.** Atrophy Rates (Cortical Thickness) in A Priori Defined Gray Matter (GM) Regions

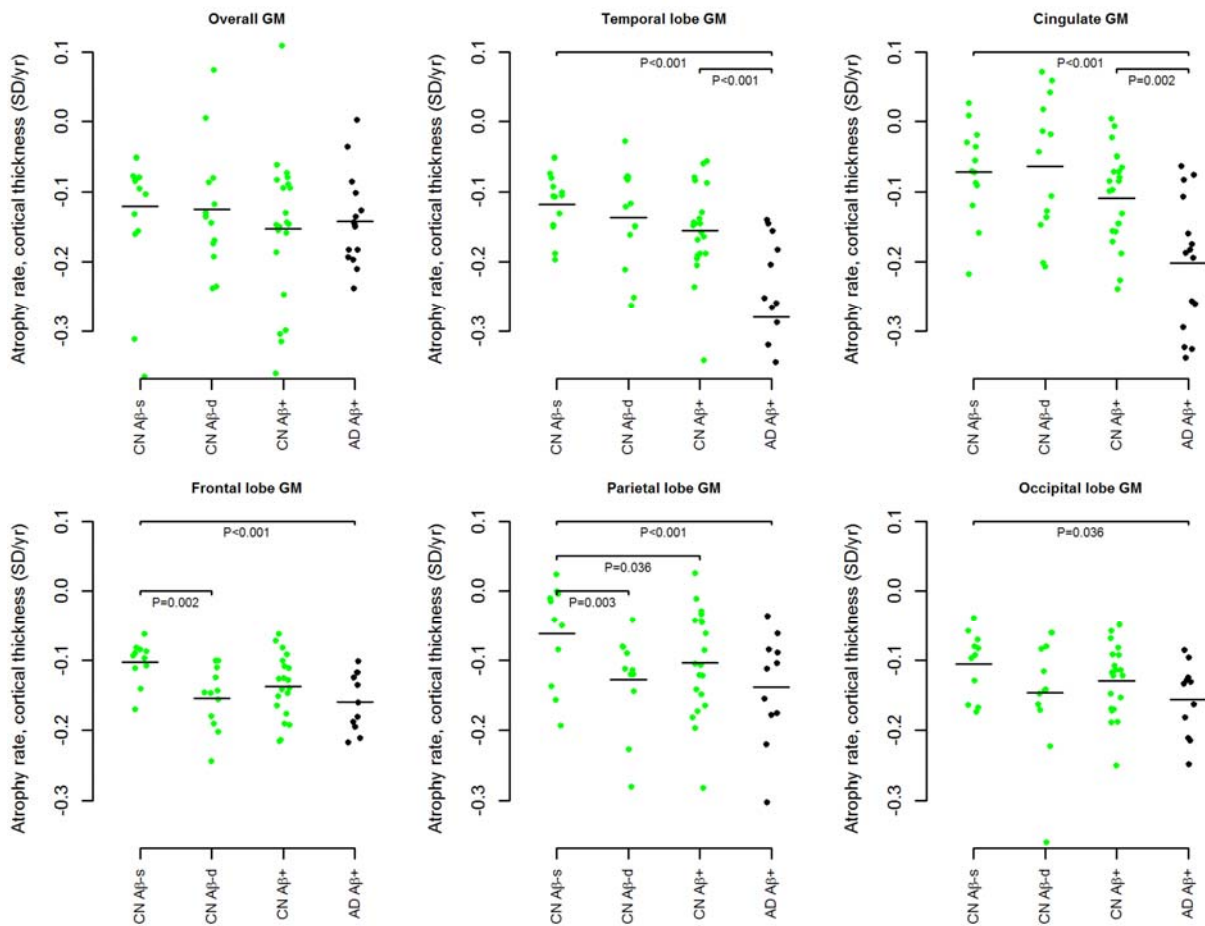

. Rate of change in cortical thickness in stable Aβ negative normal controls (CN Aβ-s), declining Aβ negative normal controls (CN Aβ-d), Aβ positive normal controls (CN Aβ+), and Aβ positive AD dementia patients (AD Aβ+). Thicknesses are centered and standardized. Rates are modeled data from linear mixed effects models (slopes), adjusted for age, sex, education, and *APOE* genotype. Horizontal lines are mean values. Significances are indicated for the group effects (pair-wise comparisons; CN Aβ-s vs. CN Aβ-d, CN Aβ-s vs. CN Aβ+, CN Aβ-s vs. AD Aβ+, and CN Aβ+ vs. AD Aβ+). When correcting for multiple comparisons (false discovery rate), differences that remained significant were (\*, P < 0.05; \*\*, P < 0.01; \*\*\*, P < 0.001): temporal GM,

© 2014 American Medical Association. All rights reserved.

CN A $\beta$ -s vs. AD A $\beta$ + (\*\*\*) , CN A $\beta$ + vs. AD A $\beta$ + (\*\*\*) ; cingulate GM, CN A $\beta$ -s vs. AD A $\beta$ + (\*\*\*) , CN A $\beta$ + vs. AD A $\beta$ + (\*\*); frontal GM, CN A $\beta$ -s vs. CN A $\beta$ -d (\*\*), CN A $\beta$ -s vs. AD A $\beta$ + (\*\*); parietal GM, CN A $\beta$ -s vs. CN A $\beta$ -d (\*\*), CN A $\beta$ -s vs. AD A $\beta$ + (\*\*); parietal GM, CN A $\beta$ -s vs. CN A $\beta$ -d (\*\*), CN A $\beta$ -s vs. AD A $\beta$ + (\*\*).

© 2014 American Medical Association. All rights reserved.

**eFigure 3.** Baseline Volumes in A Priori Defined Gray Matter (GM) Regions, Including All Participants

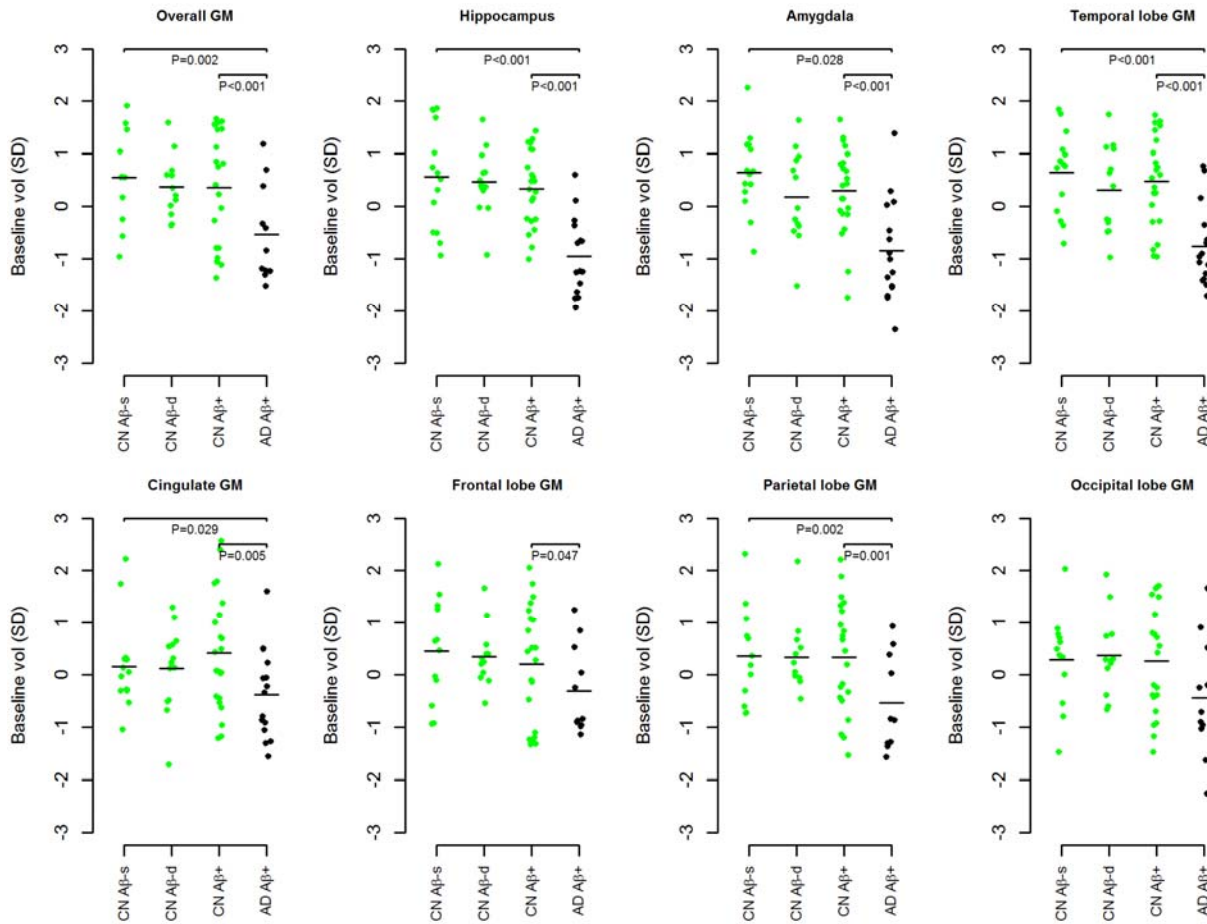

This analysis includes data from 5 subjects, where data was removed in the main analyses, as explained in the methods section. The results were similar to the main results.

**eFigure 4.** Atrophy Rates in A Priori Defined Gray Matter (GM) Regions, Including All Participants

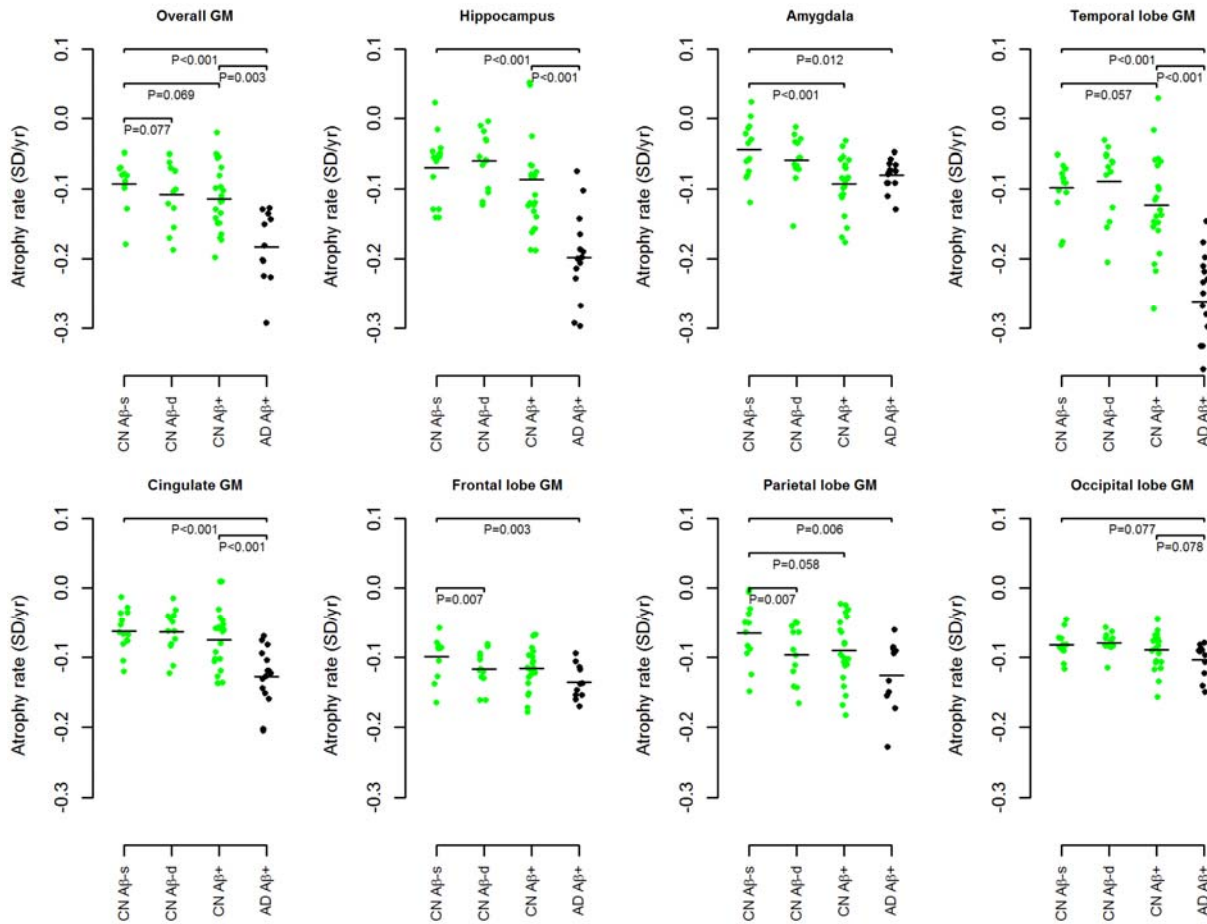

Rates of volume change. This analysis includes data from 5 subjects, where data was removed in the main analyses, as explained in the methods section. The results were similar to the main results.
